# Supplementary material for: Functional Deficits of 5×FAD Neural Stem Cells Are Ameliorated by Glutathione Peroxidase 4
Source: Cells. 2022 May 28;11(11):1770. doi: 10.3390/cells11111770 (PMC9179411; doi:10.3390/cells11111770)
Supplement: Supplementary file 1 [file cells-11-01770-s001.zip › cells-1696694-supplementary.pdf]

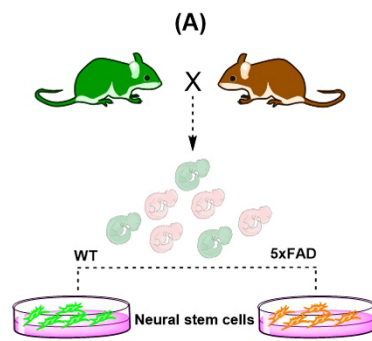

(B)

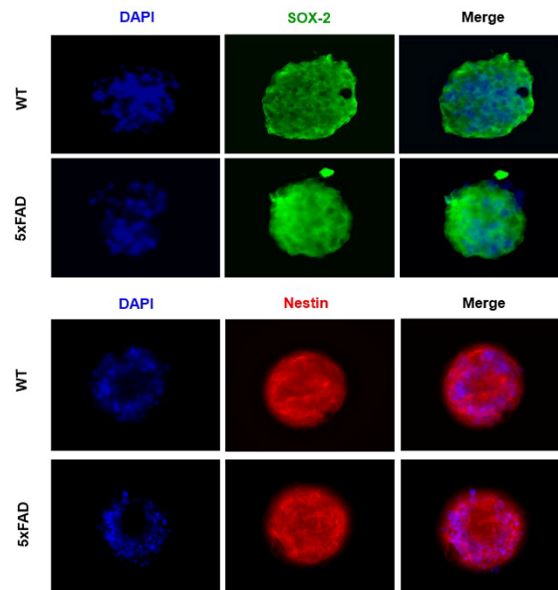

(C)

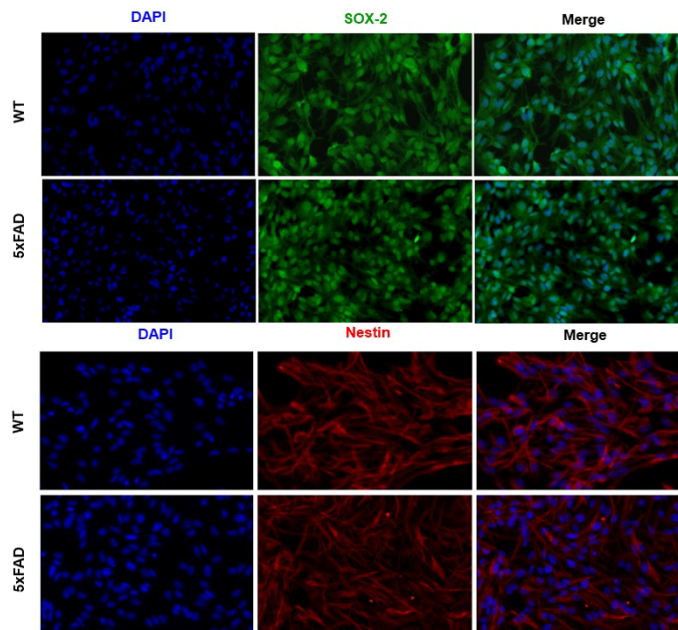

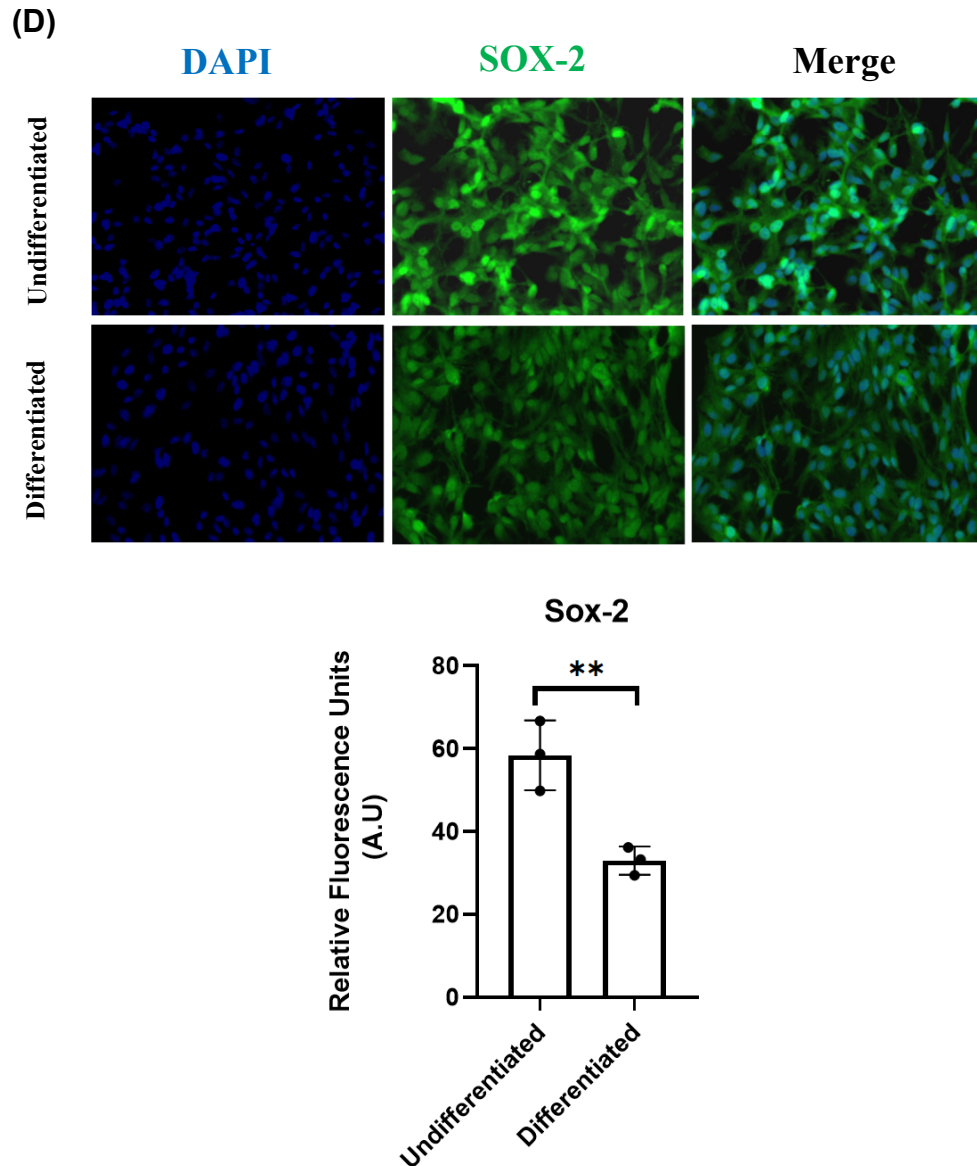

**Figure S1. Characterization of NSCs (A).** Representative culturing strategy for NSCs from pups **(B)**. Representative images of Sox-2 and Nestin (NSC markers) positive staining in neurospheres from WT and 5xFAD groups. **(C)**. Representative images of monolayers from WT and 5xFAD groups indicating expression of Sox-2 and Nestin upon differentiation. **(D)**. Expression levels of Sox-2 in Undifferentiated and RA differentiated NSCs . \*\*:  $p < 0.01$ .

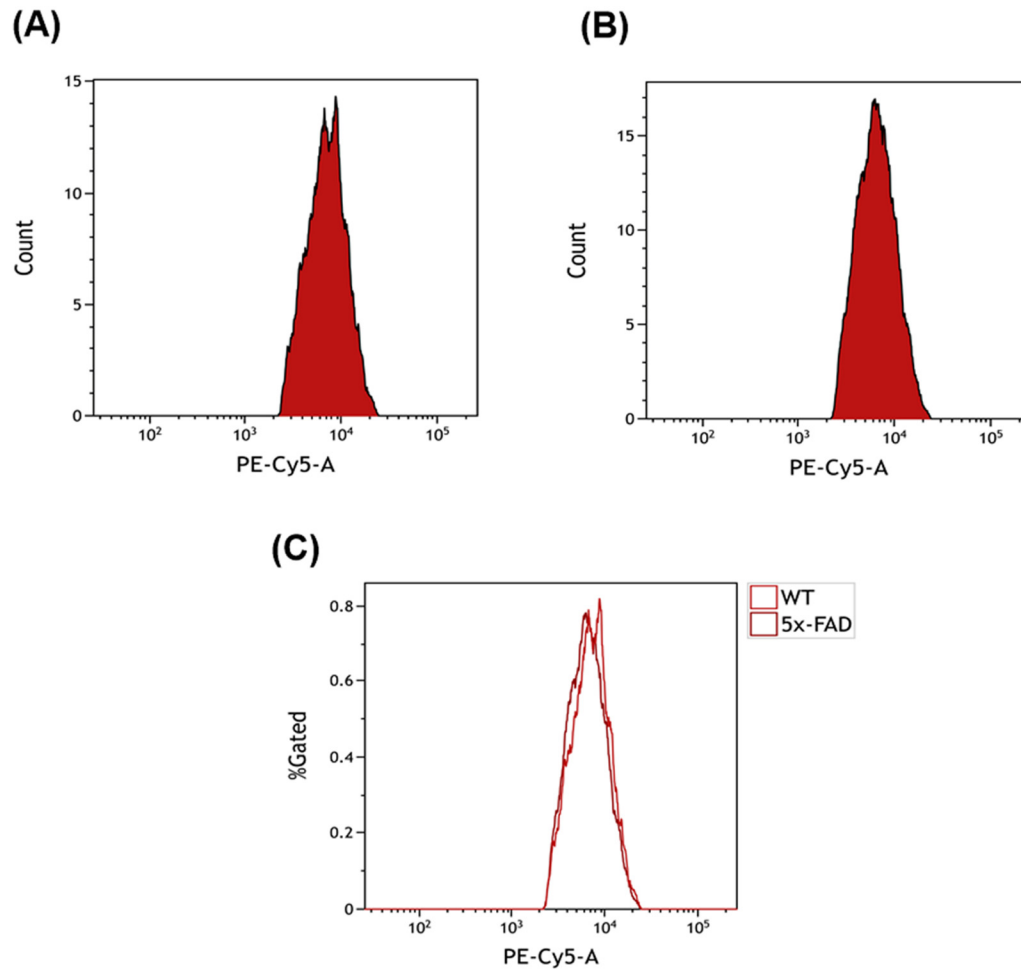

**Figure S2. Cell proliferation potential in NSCs:** (A) Flow cytometry quantification representing the Edu 647 intensity (cell proliferation indicator) in WT NSCs, (B) 5xFAD and (C) Merge. The data indicates no significant difference in proliferation potential between the groups.

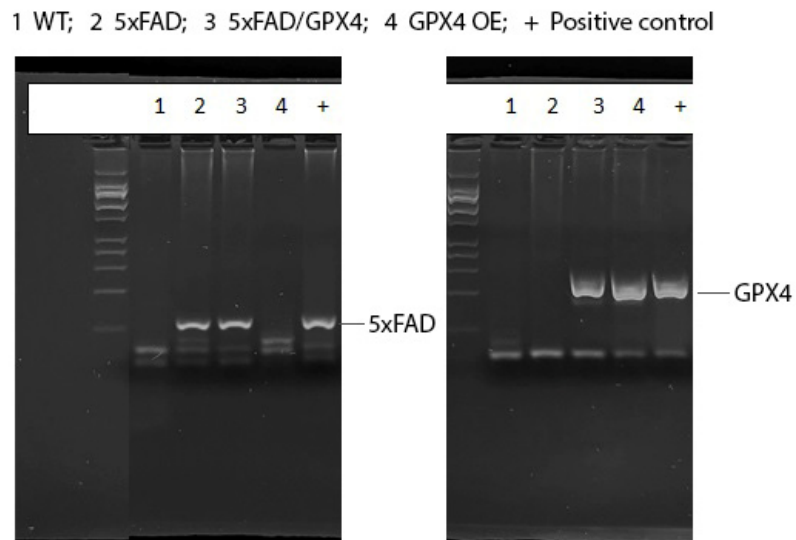

**Figure S3. Genotyping profile of NSCs:** Representative image of DNA gel indicating the specific bands that differentiate four different genotypes (WT and 5xFAD, 5xFAD/GPX4 and GPX4 OE) of NSCs along with positive controls.

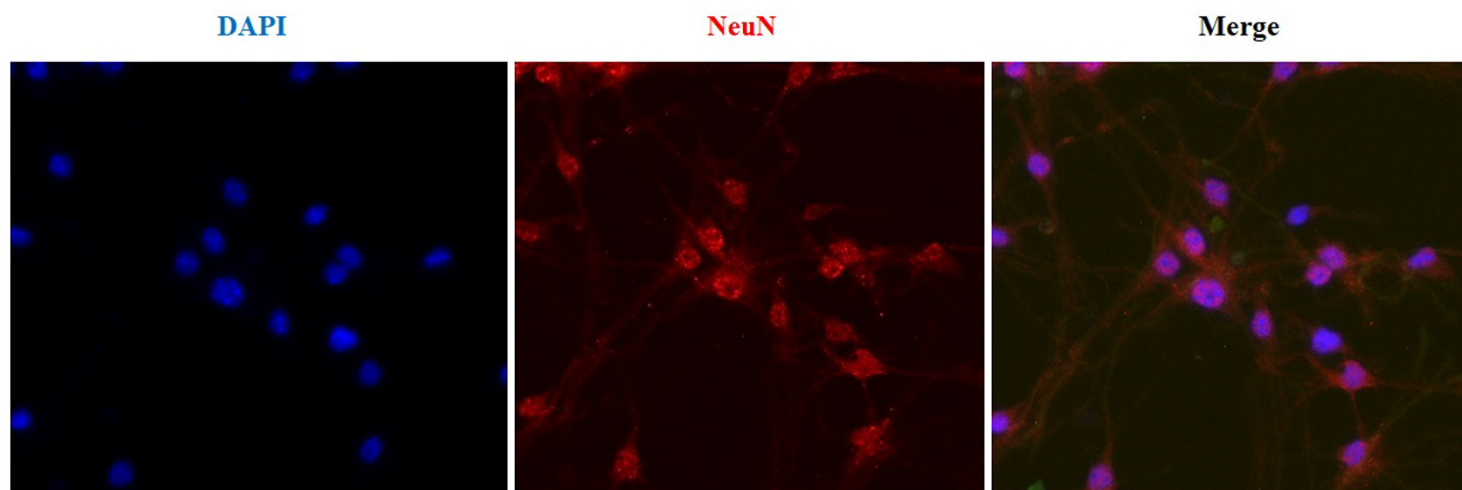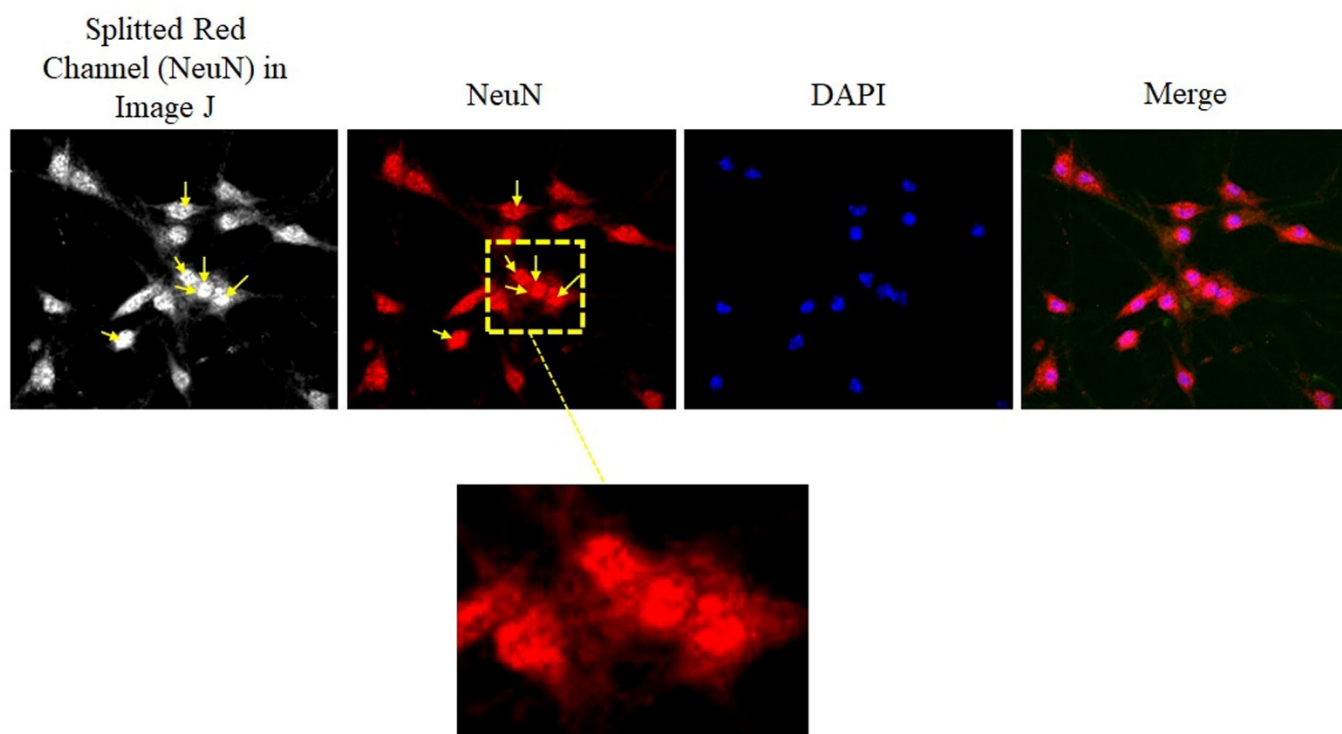

**Figure S4:** Images of NeuN staining in differentiated WT NSCs cultures
